# Supplementary material for: Hapten sensitization to vaginal mucosa induces less recruitment of dendritic cells accompanying TGF‐β‐expressing CD206+ cells compared with skin
Source: PubMed Central journal article supplement (PMC8959427; doi:10.1002/iid3.605), 2022-03-10
Supplement: IID3-10-e605-s001.pdf [file IID3-10-e605-s001.pdf]

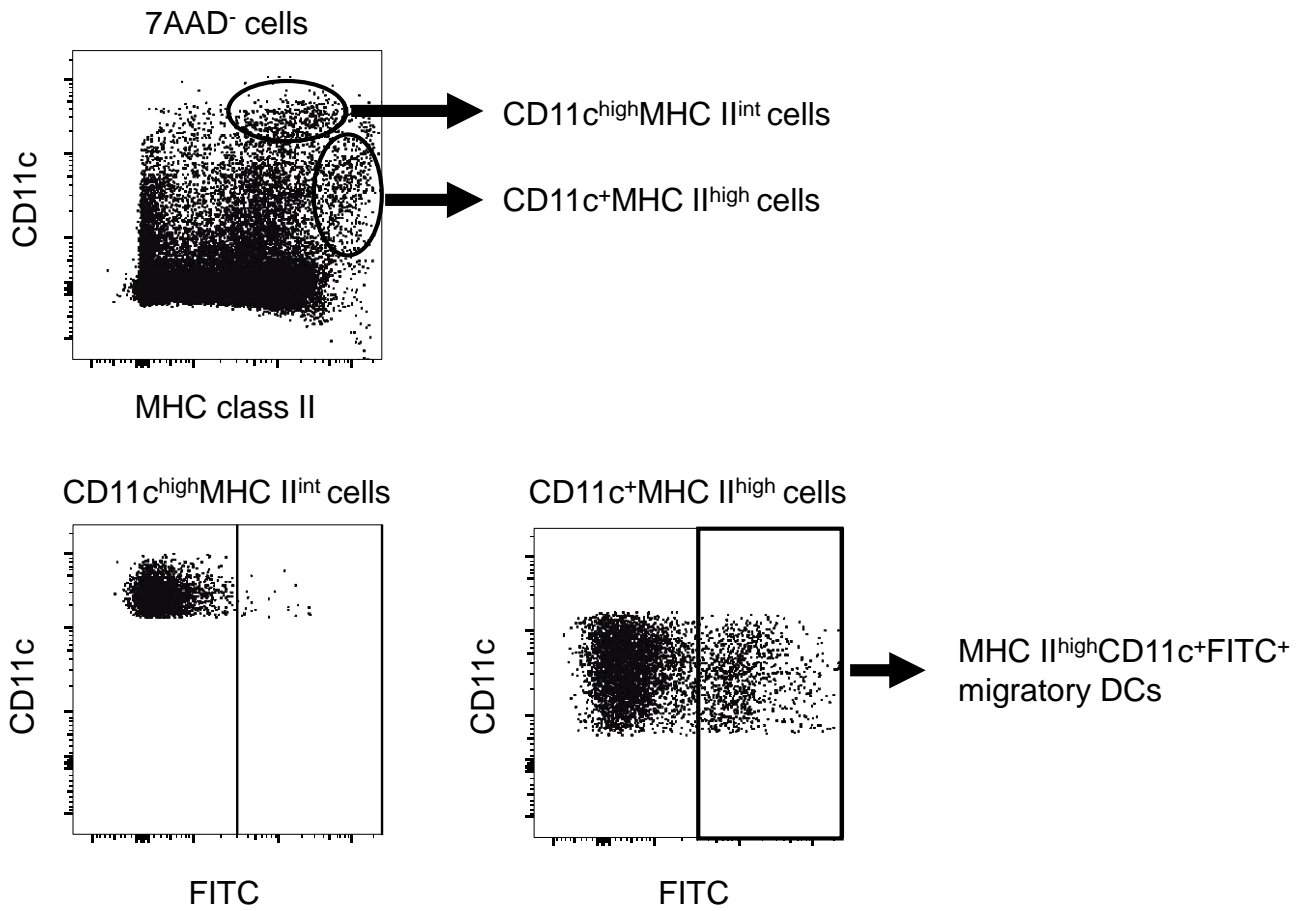

**Figure 1.** Gating strategy for identification of migratory DCs in the dLNs.
